# Supplementary material for: Effects of Dithiothreitol on Fertilization and Early Development in Sea Urchin
Source: Cells. 2021 Dec 17;10(12):3573. doi: 10.3390/cells10123573 (PMC8700669; doi:10.3390/cells10123573)
Supplement: Supplementary file 1 [file cells-10-03573-s001.zip]

Archive with 4 entries (4 files):
- Figure S1.tif
- Supplemental Material_description synthesis of BPA-C8-Cy3.pdf
- Supplemental Video1_Control 10min SW fertilization.mp4
- Supplemental Video2_ 10mM DTT 10min fertilization.mp4
